# Supplementary material for: Synthesis, structural characterization and photoluminescence property of four di(mono)acylhydrazidate-coordinated Cd2+ and Zn2+ compounds
Source: Royal Society of Chemistry journal article supplement (doi:10.1039/c2ce26263k), 2012-01-01
Supplement: c2ce26263k.pdf [file c2ce26263k.pdf]

# Supporting materials

**Table S1** The C-O distances of the acylhydrazidate molecules in the title compounds.

|         | 1        |          | 2        |          |          |          | 3        |          | 4        |
|---------|----------|----------|----------|----------|----------|----------|----------|----------|----------|
|         | I        | II       | I        | II       | III      | IV       | I        | II       |          |
| C=O (Å) | 1.238(7) | 1.250(6) | 1.243(7) | 1.242(8) | 1.270(6) | 1.260(7) | 1.249(3) | 1.246(3) | 1.245(2) |
| C-O (Å) | 1.293(6) | 1.271(5) | 1.335(7) | 1.286(8) | 1.297(6) | 1.301(7) | 1.274(3) | 1.290(3) | 1.316(2) |

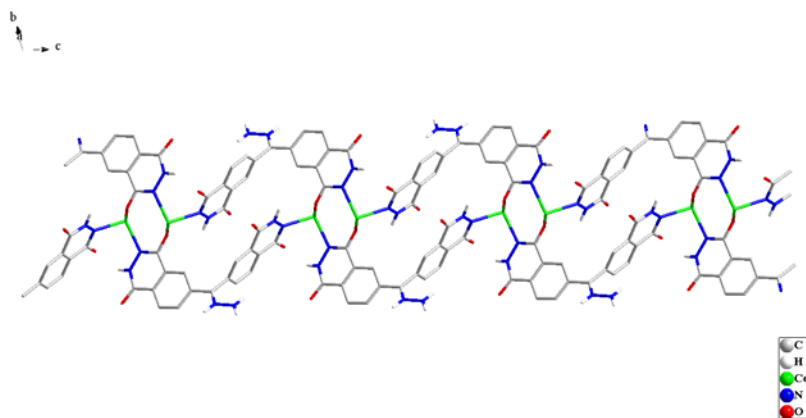

Fig. S1 The 1-D chain structure of compound **1** (phen is omitted for clarity).

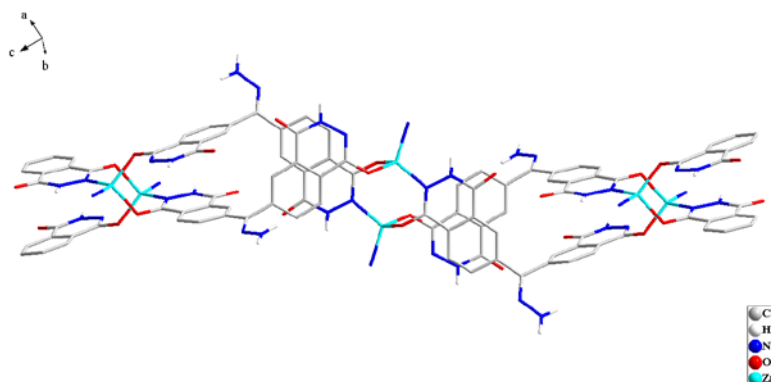

Fig. S2 The 1-D chain constructed up from Zn1 and DPHKH II for compound **2**.

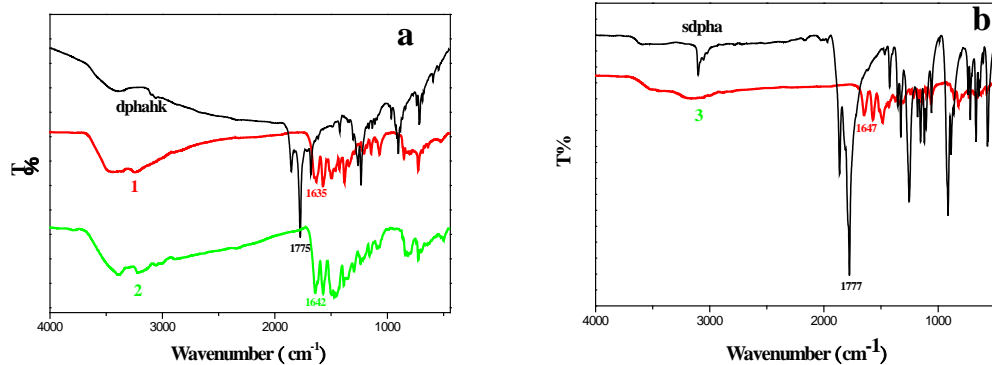

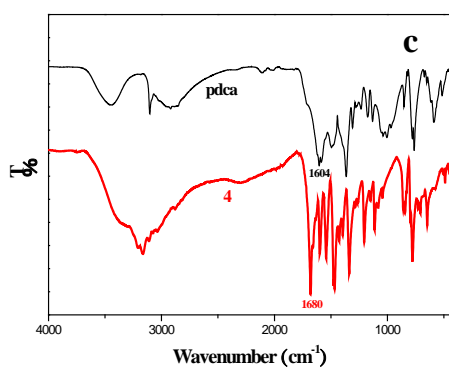

Fig. S3 The IR spectra for the title compounds and the corresponding organic acid molecules.

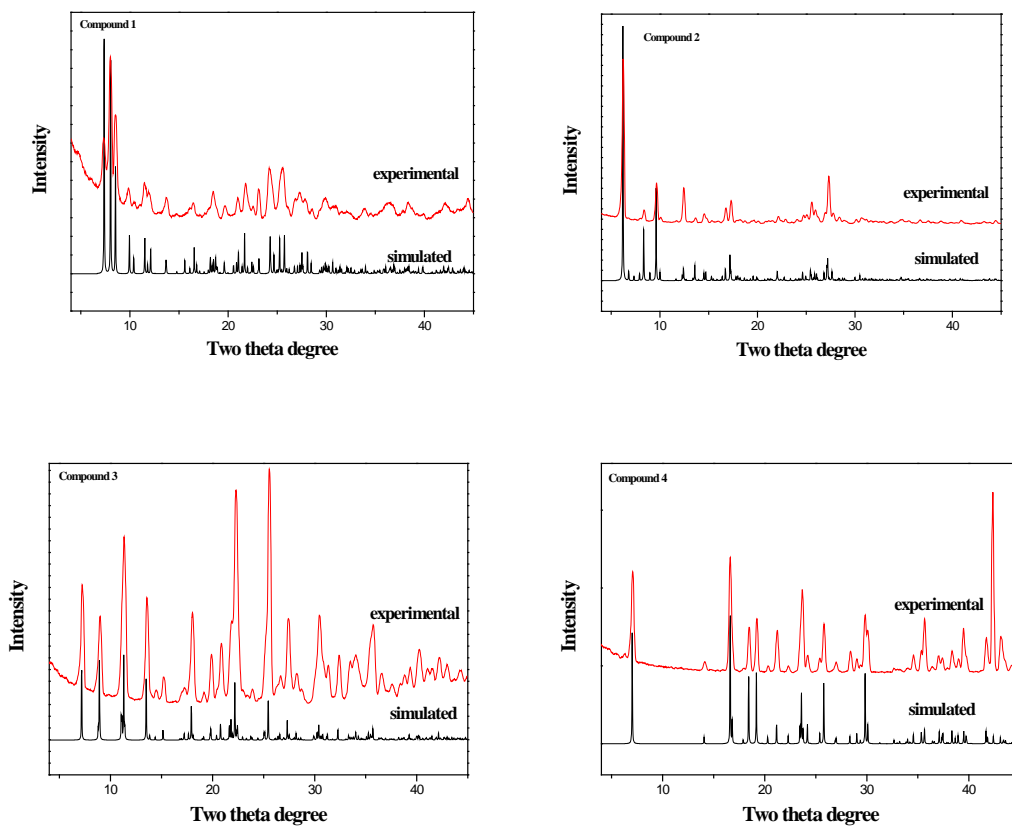

Fig. S4 The experimental and simulated powder XRD patterns for the title compounds.
